# Supplementary material
Source: PubMed Central journal article supplement (PMC3503500)

## SUPPLEMENTARY DATA

FIG. S1. (A) Vegetative features of *Chloraea membranacea*. (B) Cased specimen used in breeding system experiments in 2010 (Flores da Cunha, RS, Brazil). (C) Pollinated flowers. Notice the lateral petals covering and hiding the column. (D) Unidentified Vespidae wasp leaving a flower laden with a pollinarium. (E) Fruit showing two lines of dehiscence. Scale bars: (A, C–E) = 1 cm; (B) = 5 cm.

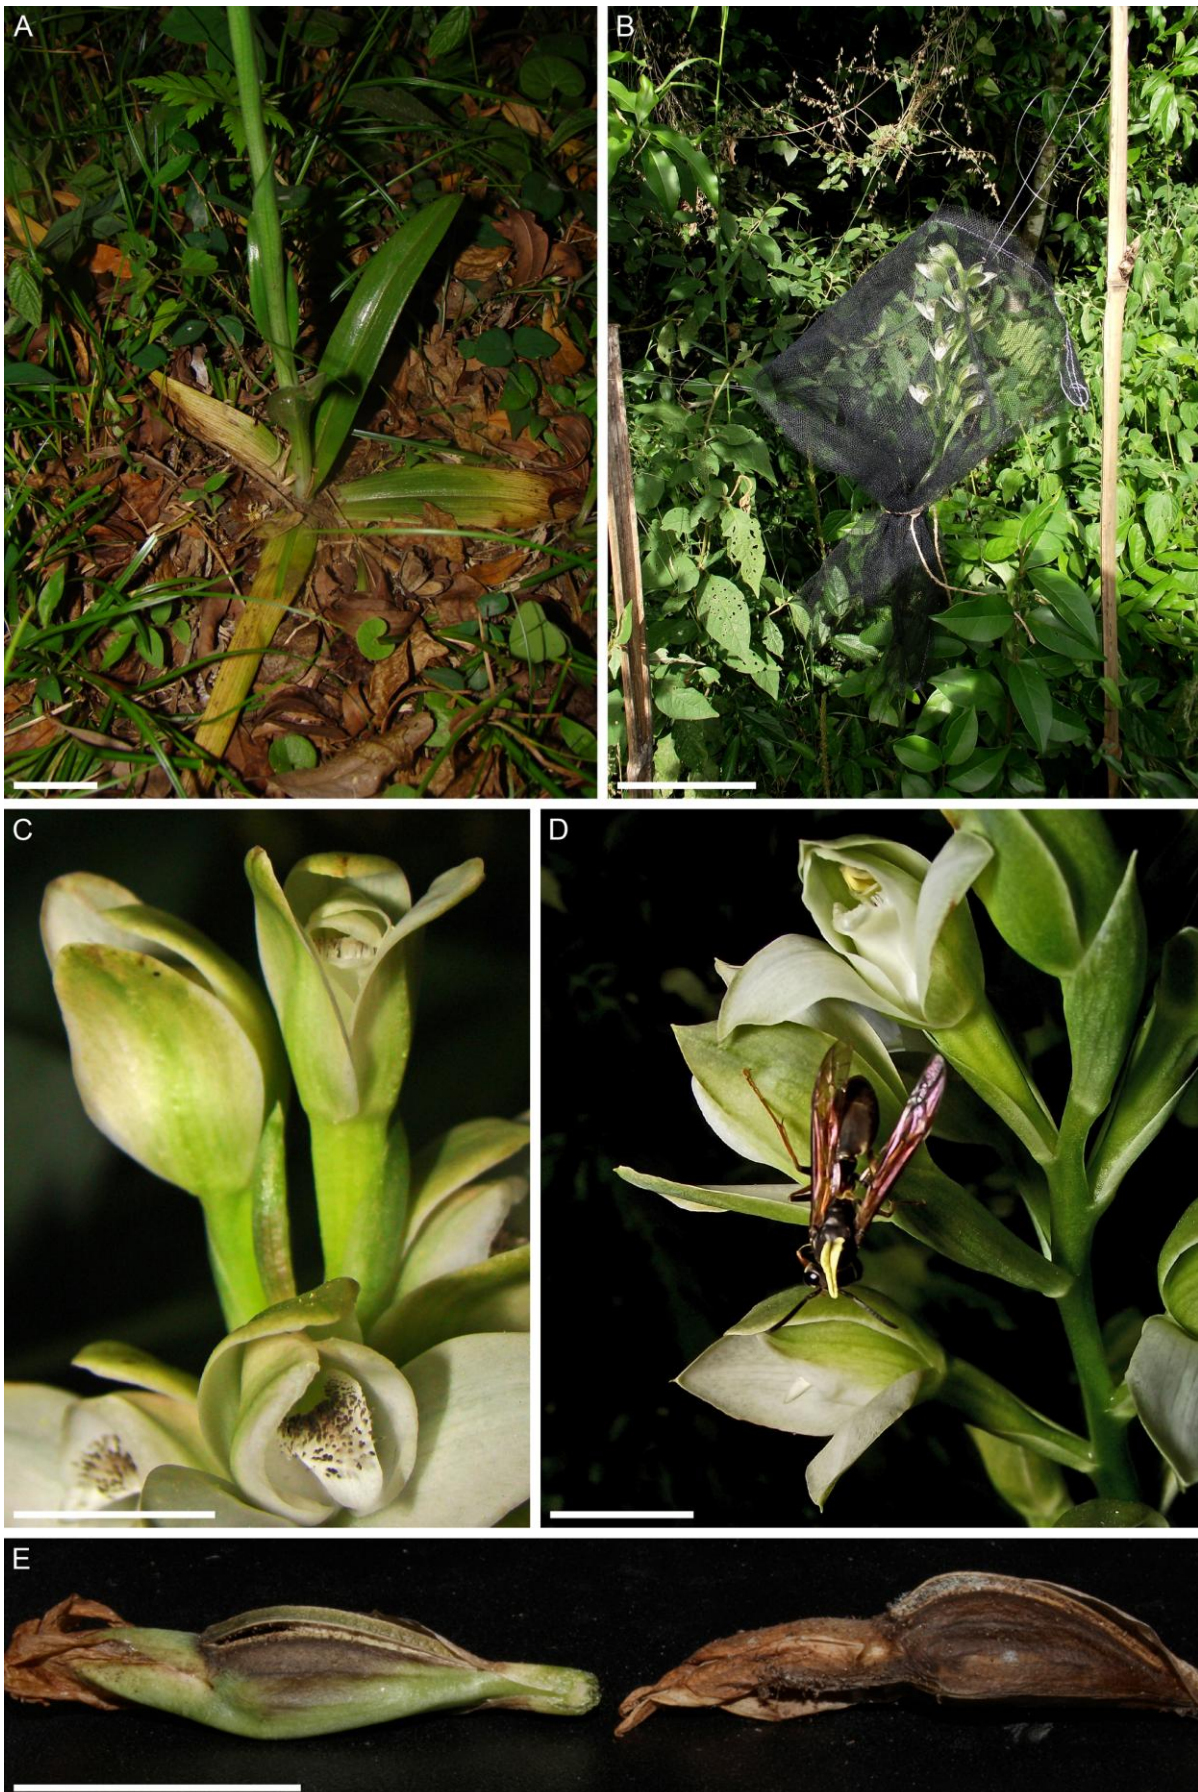

Supplement: supp_mcs221_mcs221supp.pdf [file supp_mcs221_mcs221supp.pdf]
